# Supplementary material for: Form III-like conformation and Form I-like packing in a chloroform channel solvate of the diuretic drug chlortalidone
Source: Royal Society of Chemistry journal article supplement (doi:10.1039/c2ce25766a), 2012-01-01
Supplement: c2ce25766a.pdf [file c2ce25766a.pdf]

## Supplementary Information

### **Form III-like Conformation and Form I-like Packing in a Chloroform Channel Solvate of the Diuretic Drug Chlortalidone†**

Felipe T. Martins,<sup>a</sup> Polyana J. de abreu,<sup>b</sup> Lilian C. Azarias,<sup>b</sup> Paulo C. M. Villis,<sup>b</sup> Ariane C. de Campos Melo,<sup>a</sup> Javier Ellena,<sup>c</sup> and Antônio C. Doriguetto<sup>\*b</sup>

<sup>a</sup>*Instituto de Química, Universidade Federal de Goiás, Campus Samambaia, CP 131, 74001-970, Goiânia, GO, Brazil,* <sup>b</sup>*Laboratório de Cristalografia, Instituto de Química, Universidade Federal de Alfenas—Unifal-MG, Rua Gabriel Monteiro da Silva 700, 37130-000, Alfenas, MG, Brazil,* <sup>c</sup>*Instituto de Física de São Carlos, Universidade de São Paulo, CP 369, 13560-970, São Carlos, SP, Brazil.*

\* To whom correspondence should be addressed. E-mail: [doriguetto@unifal-mg.edu.br](mailto:doriguetto@unifal-mg.edu.br); Fax: +55 3299 1067; Tel: +55 35 3299 1067

Table S1. Selected bond lengths (Å) of CTD Form I,<sup>10</sup> Form III,<sup>10</sup> and Form IV (this study).

| Bond     | Form I   | Form III | Form IV     |             |
|----------|----------|----------|-------------|-------------|
|          |          |          | Conformer A | Conformer B |
| C1-C8    | 1.513(3) | 1.517(3) | 1.524(7)    | 1.532(7)    |
| C2-C3    | 1.473(3) | 1.467(3) | 1.465(7)    | 1.460(7)    |
| C3-C4    | 1.386(3) | 1.384(3) | 1.382(7)    | 1.376(7)    |
| C4-C5    | 1.380(3) | 1.377(3) | 1.383(8)    | 1.363(8)    |
| C5-C6    | 1.387(4) | 1.389(4) | 1.380(8)    | 1.385(9)    |
| C6-C7    | 1.382(3) | 1.391(3) | 1.420(8)    | 1.383(8)    |
| C7-C8    | 1.378(3) | 1.379(3) | 1.368(7)    | 1.376(7)    |
| C3-C8    | 1.382(3) | 1.381(3) | 1.364(7)    | 1.385(7)    |
| C1-C9    | 1.525(3) | 1.520(3) | 1.530(6)    | 1.504(6)    |
| C9-C10   | 1.394(3) | 1.391(3) | 1.375(6)    | 1.380(6)    |
| C10-C11  | 1.394(3) | 1.388(3) | 1.384(6)    | 1.400(6)    |
| C11-C12  | 1.385(3) | 1.397(3) | 1.407(6)    | 1.403(7)    |
| C12-C13  | 1.380(3) | 1.383(3) | 1.381(6)    | 1.357(7)    |
| C13-C14  | 1.382(3) | 1.381(3) | 1.372(6)    | 1.377(7)    |
| C9-C14   | 1.382(3) | 1.386(3) | 1.387(6)    | 1.383(6)    |
| N1-C1    | 1.468(3) | 1.466(3) | 1.479(6)    | 1.470(6)    |
| N1-C2    | 1.346(3) | 1.342(3) | 1.349(6)    | 1.352(6)    |
| O1-C2    | 1.242(2) | 1.242(3) | 1.227(6)    | 1.250(6)    |
| O2-C1    | 1.419(3) | 1.411(3) | 1.411(5)    | 1.406(5)    |
| S1-C11   | 1.786(2) | 1.781(2) | 1.778(5)    | 1.762(5)    |
| S1-N2    | 1.590(2) | 1.595(2) | 1.590(4)    | 1.536(5)    |
| S1-O3    | 1.419(2) | 1.428(2) | 1.416(3)    | 1.435(4)    |
| S1-O4    | 1.429(2) | 1.431(2) | 1.464(4)    | 1.537(5)    |
| C11-C12  | 1.728(2) | 1.727(2) | 1.724(5)    | 1.742(5)    |
| Cl1s-C1s | -        | -        |             | 1.69(3)     |
| Cl2s-C1s | -        | -        |             | 1.47(2)     |
| Cl3s-C1s | -        | -        |             | 1.53(2)     |

Table S2. Selected valence angles (°) of CTD Form I,<sup>10</sup> Form III,<sup>10</sup> and Form IV (this study).

| Angle       | Form I   | Form III | Form IV     |             |
|-------------|----------|----------|-------------|-------------|
|             |          |          | Conformer A | Conformer B |
| C1-C8-C3    | 109.9(2) | 109.6(2) | 110.6(5)    | 110.3(6)    |
| C1-C8-C7    | 129.1(2) | 129.3(2) | 128.2(6)    | 129.3(6)    |
| C1-C9-C10   | 118.8(2) | 118.9(2) | 120.8(4)    | 121.1(4)    |
| C1-C9-C14   | 122.0(2) | 122.0(2) | 119.3(4)    | 120.4(5)    |
| C2-C3-C4    | 130.4(2) | 129.9(2) | 128.9(6)    | 130.1(6)    |
| C2-C3-C8    | 108.2(2) | 108.3(2) | 109.2(6)    | 108.0(6)    |
| C3-C4-C5    | 117.5(2) | 117.5(2) | 118.3(6)    | 117.4(7)    |
| C3-C8-C7    | 120.9(2) | 121.0(2) | 121.1(6)    | 120.4(6)    |
| C4-C5-C6    | 121.1(2) | 120.9(2) | 120.3(7)    | 121.4(7)    |
| C4-C3-C8    | 121.4(2) | 121.8(2) | 121.9(6)    | 121.9(6)    |
| C5-C6-C7    | 121.0(2) | 121.3(2) | 120.5(7)    | 121.1(7)    |
| C6-C7-C8    | 118.1(2) | 117.4(2) | 117.8(6)    | 117.7(7)    |
| C8-C1-C9    | 115.0(2) | 114.3(2) | 113.2(4)    | 112.2(5)    |
| C9-C10-C11  | 120.5(2) | 120.7(2) | 120.8(4)    | 121.9(5)    |
| C9-C14-C13  | 120.5(2) | 120.7(2) | 120.2(5)    | 121.1(5)    |
| C10-C11-C12 | 119.2(2) | 119.4(2) | 119.1(5)    | 117.1(5)    |
| C10-C9-C14  | 119.2(2) | 119.1(2) | 119.8(4)    | 118.4(5)    |
| C11-C12-C13 | 120.4(2) | 119.9(2) | 119.4(5)    | 121.5(5)    |
| C12-C13-C14 | 120.2(2) | 120.2(2) | 120.6(5)    | 119.9(5)    |
| C1-N1-C2    | 113.7(2) | 113.8(2) | 114.7(5)    | 114.1(5)    |
| N1-C1-C8    | 101.0(2) | 100.7(2) | 99.3(4)     | 100.0(4)    |
| N1-C1-C9    | 110.6(2) | 112.6(2) | 111.8(4)    | 111.9(4)    |
| N1-C2-C3    | 107.1(2) | 107.2(2) | 106.2(5)    | 107.7(5)    |
| N1-C1-O2    | 111.9(2) | 111.5(2) | 111.2(4)    | 111.6(4)    |
| N1-C2-O1    | 125.8(2) | 125.7(2) | 126.0(6)    | 124.0(6)    |
| N2-S1-O3    | 107.7(1) | 108.6(1) | 109.0(3)    | 112.9(3)    |
| N2-S1-O4    | 106.9(1) | 108.6(1) | 108.5(3)    | 108.5(3)    |
| N2-S1-C11   | 106.6(1) | 106.8(1) | 108.0(3)    | 107.9(3)    |
| O1-C2-C3    | 127.0(2) | 127.0(2) | 127.8(6)    | 128.3(6)    |
| O2-C1-C8    | 112.4(2) | 111.2(2) | 113.3(4)    | 112.4(4)    |
| O2-C1-C9    | 105.9(2) | 106.5(2) | 107.9(4)    | 108.7(4)    |
| O3-S1-O4    | 119.6(2) | 118.4(1) | 117.6(3)    | 114.0(3)    |
| O3-S1-C11   | 105.8(1) | 106.1(1) | 105.5(2)    | 106.1(2)    |
| O4-S1-C11   | 109.5(1) | 107.8(1) | 107.9(3)    | 107.2(3)    |
| C11-C12-C11 | 122.0(2) | 121.8(2) | 122.6(4)    | 120.8(4)    |

|               |          |          |           |          |
|---------------|----------|----------|-----------|----------|
| C11-C12-C13   | 117.6(2) | 118.3(2) | 118.0(4)  | 117.7(4) |
| S1-C11-C10    | 117.6(2) | 118.2(2) | 118.0(4)  | 118.8(4) |
| S1-C11-C12    | 123.1(2) | 122.3(2) | 122.9(4)  | 124.0(4) |
| C11s-C1s-C12s | -        | -        | 104.1(16) |          |
| C11s-C1s-C13s | -        | -        | 102.9(14) |          |
| C12s-C1s-C13s | -        | -        | 129(2)    |          |

---
